# Supplementary material for: Opportunities and Hurdles to the Adoption and Enhanced Efficacy of Feed Additives towards Pronounced Mitigation of Enteric Methane Emissions from Ruminant Livestock
Source: MDPI journal article supplement (doi:10.3390/methane1040021), 2022-10-27
Supplement: s1 [file s1]

**Table S1.** In vivo experimental treatments resulting in 60% or more decrease in enteric methane (CH<sub>4</sub>) production.

| Reference                          | Animal, diet                | Inhibitor/algae<br>(g/kg diet DM <sup>1</sup> ) | Treatment<br>period (d) | Inhibition relative to Control<br>treatment (% decrease in CH <sub>4</sub><br>animal <sup>-1</sup> d <sup>-1</sup> ) | Comments                                                                                  |
|------------------------------------|-----------------------------|-------------------------------------------------|-------------------------|----------------------------------------------------------------------------------------------------------------------|-------------------------------------------------------------------------------------------|
| Trei et al. (1971)<br>experiment 1 | Lambs,<br>mixed             | 2, 2, 2-<br>trichloroacetamide<br>(0.10)        | 7                       | 94 <sup>2</sup>                                                                                                      | Decreased rumen acetate to<br>propionate concentration ratio                              |
| Trei et al. (1971)<br>experiment 2 | Lambs,<br>mixed             | Hemiacetal of<br>chloral and starch<br>(2.0)    | 90                      | 67 <sup>2</sup>                                                                                                      | Additive tended to improve G: F                                                           |
| Johnson (1972)                     | Lambs,<br>mixed             | Hemiacetal of<br>chloral and starch<br>(2.2)    | 9                       | 49 to 82                                                                                                             | Restricted DMI. Inhibition was<br>greater at high intake level                            |
| Johnson et al.<br>(1972)           | Steers, mixed               | BCM (0.50)                                      | 28                      | ~65 <sup>2, 3</sup>                                                                                                  | ADG unaffected                                                                            |
| Johnson (1974)                     | Lambs, high<br>concentrate  | Hemiacetal of<br>chloral and starch<br>(1.1)    | 3                       | 64                                                                                                                   | N retention improved                                                                      |
| Sawyer et al.<br>(1974)            | Sheep                       | BCM (0.1 – 0.3)                                 | 26                      | 83 to 86                                                                                                             | Improved DM and N digestibility                                                           |
| Davies et al.<br>(1982)            | Calves,<br>mixed            | ICI 13409<br>(0.20)                             | 196                     | 63 <sup>2</sup>                                                                                                      | Improved ADG and G: F                                                                     |
| Mathers and<br>Miller (1982)       | Ewes, mixed                 | Chloral hydrate<br>(intraruminal, ~ 1-<br>4)    | 10                      | 96                                                                                                                   | Digestibility unaffected.<br>Decreased rumen acetate to<br>propionate concentration ratio |
| McCrabb et al.<br>(1997)           | Steers,<br>roughage         | BCM (0.26)                                      | 28                      | CH <sub>4</sub> not detected                                                                                         | No difference in final body mass                                                          |
| Tomkins and<br>Hunter (2004)       | Steers, high<br>concentrate | BCM (0.15-0.20)                                 | 28                      | 88-91                                                                                                                | No effects on animal performance                                                          |

|                                    |                          |                                      |     |                        |                                                                                                                     |
|------------------------------------|--------------------------|--------------------------------------|-----|------------------------|---------------------------------------------------------------------------------------------------------------------|
| Knight et al. (2011)               | Cows, roughage           | Chloroform (0.27)                    | 42  | ~38 to 97 <sup>6</sup> | Extent of inhibition of methanogenesis decreased as the experiment progressed                                       |
| Mitsumori et al. (2012)            | Goats, mixed             | BCM (2.6)                            | 22  | 91                     | No effects on digestibility. Decreased rumen acetate to propionate concentration ratio                              |
| Haisan et al. (2014)               | Cows, mixed              | 3-NOP (0.13)                         | 28  | 60                     | No change in DMI and milk production and composition. Greater body mass recovery with 3-NOP                         |
| Romero-Perez et al. (2015)         | Heifers, mixed           | 3-NOP (0.28)                         | 112 | 59                     | No effect on ADG <sup>4</sup> . Decreased rumen acetate to propionate concentration ratio                           |
| Li et al. (2016)                   | Wethers, mixed           | <i>Asparagopsis taxiformis</i> (2.7) | 72  | 81                     | No effects on ADG. Decreased rumen acetate to propionate concentration ratio. Ruminal mucosa alterations identified |
| Martinez-Fernandez et al. (2016)   | Steers, mixed            | Chloroform (1.50)                    | 10  | 65                     | Decreased rumen acetate to propionate concentration ratio                                                           |
| Vyas et al. (2016), finishing diet | Steers, high concentrate | 3-NOP (0.2)                          | 105 | 84                     | DMI and ADG tended to decrease                                                                                      |
| McGinn et al. (2019)               | Cattle, high concentrate | 3-NOP (0.125)                        | 123 | ~70                    | Experiment conducted in a commercial feedlot                                                                        |
| Roque et al. (2019)                | Cows, mixed              | <i>Asparagopsis armata</i> (10)      | 21  | 67                     | DMI decreased. Milk production and protein decreased with highest dose                                              |
| Kinley et al. (2020)               | Steers, high concentrate | <i>Asparagopsis taxiformis</i> (1.8) | 90  | 98                     | Increased ADG                                                                                                       |
| Roque et al. (2021)                | Steers, high concentrate | <i>Asparagopsis taxiformis</i> (4.7) | 63  | 82                     | No effects on ADG. Tendency to decreased DMI and improved F:                                                        |

|                                  |                                                                   |                                                    |     |                 |                                                                            |
|----------------------------------|-------------------------------------------------------------------|----------------------------------------------------|-----|-----------------|----------------------------------------------------------------------------|
|                                  |                                                                   |                                                    |     |                 | G. No effects on carcass or meat quality                                   |
| Alemu et al. (2021)              | Steers, high concentrate                                          | 3-NOP (0.108)                                      | 112 | 77              | Decreased DMI                                                              |
| Cristobal-Carballo et al. (2021) | Calves, milk replacer, concentrate, partial mixed ration, pasture | Chloroform (0.050) plus 9, 10-anthraquinone (0.50) | 84  | 90 <sup>3</sup> | No effects on DMI and ADG                                                  |
| Garcia et al. (2022)             | Cows, mixed                                                       | 3-NOP (0.10)                                       | 15  | 60              | Decrease in CH <sub>4</sub> despite more methanogenic diet in 3-NOP period |

<sup>1</sup>Abbreviations: 3-NOP = 3-nitrooxypropanol; ADG = average daily body mass gain; BCM = bromochloromethane; CH<sub>4</sub> = methane; DM = dry matter; DMI = dry matter intake; G: F = body mass gain per kilogram of dry matter intake; ICI 13409 = 2,4-bis(trichloromethyl)-benzo [ 1, 3]dioxin-6-carboxylic acid .

<sup>2</sup>Methane concentration, rather than production, was measured, by rumenotomy (Trei et al., 1971; Trei et al., 1972), rumen headspace sampled through the cannula (Johnson et al., 1972), or air expelled in hood (Davies et al., 1982).

<sup>3</sup>Daily average, estimated from graph.

<sup>4</sup>A. Romero-Perez, pers. comm.

## References

- Alemu, A.W., Shreck, A.L., Booker, C.W., McGinn, S.M., Pekrul, L.K.D., Kindermann, M. *et al.* (2021). Use of 3-nitrooxypropanol in a commercial feedlot to decrease enteric methane emissions from cattle fed a corn-based finishing diet. *J. Anim. Sci.* 99. doi: 10.1093/jas/skaa394
- Cristobal-Carballo, O., McCoard, S.A., Cookson, A.L., Ganesh, S., Lowe, K., Laven, R.A. *et al.* (2021). Effect of Methane Inhibitors on Ruminal Microbiota During Early Life and Its Relationship With Ruminal Metabolism and Growth in Calves. *Front. Microbiol.* 12. doi: 10.3389/fmicb.2021.710914
- Davies, A., Nwaonu, H.N., Stanier, G., and Boyle, F.T. (1982). Properties of a novel series of inhibitors of rumen methanogenesis; in vitro and in vivo experiments including growth trials on 2,4-bis (trichloromethyl)-benzo [1, 3]dioxin-6-carboxylic acid. *Brit. J. Nutr.* 47: 565-576. doi: 10.1079/bjn19820068
- Garcia, F., Muñoz, C., Martínez-Ferrer, J., Urrutia, N.L., Martínez, E.D., Saldivia, M. *et al.* (2022). 3-Nitrooxypropanol substantially decreased enteric methane emissions of dairy cows fed true protein- or urea-containing diets. *Heliyon* 8: e09738. doi: <https://doi.org/10.1016/j.heliyon.2022.e09738>
- Haisan, J., Sun, Y., Guan, L.L., Beauchemin, K.A., Iwaasa, A., Duval, S. *et al.* (2014). The effects of feeding 3-nitrooxypropanol on methane emissions and productivity of Holstein cows in mid lactation. *J. Dairy Sci.* 97: 3110-3119. doi: 10.3168/jds.2013-7834
- Johnson, D.E. (1972). Effects of a hemiacetal of chloral and starch on methane production and energy balance of sheep fed a pelleted diet. *J. Anim. Sci.* 35: 1064-1068. doi: not available
- Johnson, D.E. (1974). Adaptational responses in nitrogen and energy balance of lambs fed a methane inhibitor. *J. Anim. Sci.* 38: 154-157. doi: not available
- Johnson, E.D., Wood, A.S., Stone, J.B., and Moran Jr, E.T. (1972). Some effects of methane inhibition in ruminants (steers). *Can. J. Anim. Sci.* 52: 703-712. doi: 10.4141/cjas72-083
- Kinley, R.D., Martinez-Fernandez, G., Matthews, M.K., de Nys, R., Magnusson, M., and Tomkins, N.W. (2020). Mitigating the carbon footprint and improving productivity of ruminant livestock agriculture using a red seaweed. *J. Clean. Prod.* 259: 120836. doi: 10.1016/j.jclepro.2020.120836
- Knight, T., Ronimum, R.S., Dey, D., Tootill, C., Naylor, G., Evans, P. *et al.* (2011). Chloroform decreases rumen methanogenesis and methanogen populations without altering rumen function in cattle. *Anim. Feed Sci. Technol.* 166-167: 101-112. doi: 10.1016/j.anifeedsci.2011.04.059
- Li, X., Norman, H.C., Kinley, R.D., Laurence, M., Wilmot, M., Bender, H. *et al.* (2016). *Asparagopsis taxiformis* decreases enteric methane production from sheep. *Anim. Prod. Sci.* 58: 681-688. doi: doi.org/10.1071/AN15883
- Martinez-Fernandez, G., Denman, S.E., Yang, C., Cheung, J., Mitsumori, M., and McSweeney, C.S. (2016). Methane inhibition alters the microbial community, hydrogen flow, and fermentation response in the rumen of cattle. *Front. Microbiol.* 7: 1122. doi: 10.3389/fmicb.2016.01122
- Mathers, J.C., and Miller, E.L. (1982). Some effects of chloral hydrate on rumen fermentation and digestion in sheep. *J. Agric. Sci. (Camb.)* 99: 215-224. doi: 10.1017/S0021859600055234

- McCrabb, G.J., Berger, K.T., T., M., May, C., and Hunter, R.A. (1997). Inhibiting methane production in Brahman cattle by dietary supplementation with a novel compound and the effects on growth. *Aust. J. Agr. Res.* 48: 323-329. doi: 10.1071/AR96119
- McGinn, S.M., Flesch, T.K., Beauchemin, K.A., Shreck, A., and Kindermann, M. (2019). Micrometeorological Methods for Measuring Methane Emission Reduction at Beef Cattle Feedlots: Evaluation of 3-Nitrooxypropanol Feed Additive. *J. Environ. Qual.* 48: 1454-1461. doi: <https://doi.org/10.2134/jeq2018.11.0412>
- Mitsumori, M., Shinkai, T., Takenaka, A., Enishi, O., Higuchi, K., Kobayashi, Y. *et al.* (2012). Responses in digestion, rumen fermentation and microbial populations to inhibition of methane formation by a halogenated methane analogue. *Brit. J. Nutr.* 108: 482-491. doi: 10.1017/S0007114511005794
- Romero-Perez, A., Okine, E.K., McGinn, S.M., Guan, L.L., Oba, M., Duval, S.M. *et al.* (2015). Sustained reduction in methane production from long-term addition of 3-nitrooxypropanol to a beef cattle diet. *J. Anim. Sci.* 93: 1780-1791. doi: 10.2527/jas.2014-8726
- Roque, B.M., Salwen, J.K., Kinley, R., and Kebreab, E. (2019). Inclusion of *Asparagopsis armata* in lactating dairy cows' diet reduces enteric methane emission by over 50 percent. *J. Clean. Prod.* 234: 132-138. doi: 10.1016/j.jclepro.2019.06.193
- Roque, B.M., Venegas, M., Kinley, R.D., de Nys, R., Duarte, T.L., Yang, X. *et al.* (2021). Red seaweed (*Asparagopsis taxiformis*) supplementation reduces enteric methane by over 80 percent in beef steers. *PloS One* 16: e0247820. doi: 10.1371/journal.pone.0247820
- Sawyer, M.S., Hoover, W.H., and Sniffen, C.J. (1974). Effect of a ruminal methane inhibitor on growth and energy metabolism in the ovine. *J. Anim. Sci.* 38: 908-914. doi: not available
- Tomkins, N.W., and Hunter, R.A. (2004). "Methane reduction in beef cattle using a novel antimethanogen,"in. Proceedings of the Australian Society of Animal Production 25th Biennial Conference : the new realities, ed. R. Stockdale, J. Heard and M. Jenkin (University of Melbourne, Parkville, Vic.: CSIRO Publishing 329.
- Trei, J.E., Parish, R.C., and Singh, Y.K. (1971). Effect of methane inhibitors on rumen metabolism and feedlot performance of sheep. *J. Dairy Sci.* 54: 536-540. doi: not available
- Trei, J.E., Scott, G.C., and Parish, R.C. (1972). Influence of methane inhibition on energetic efficiency of lambs. *J. Anim. Sci.* 34: 510-515. doi: not available
- Vyas, D., McGinn, S.M., Duval, S.M., Kindermann, M., and Beauchemin, K.A. (2016). Effects of sustained reduction of enteric methane emissions with dietary supplementation of 3-nitrooxypropanol on growth performance of growing and finishing beef cattle. *J. Anim. Sci.* 94: 2024-2034. doi: 10.2527/jas.2015-0268
